# Supplementary material for: Evaluation of Optimized Tube-Gel Methods of Sample Preparation for Large-Scale Plant Proteomics
Source: MDPI journal article supplement (doi:10.3390/proteomes6010006), 2018-01-30

### Oxidized Met

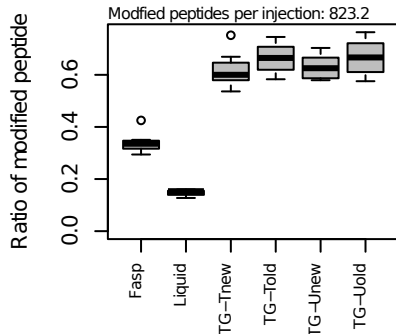

### Deamided Asn

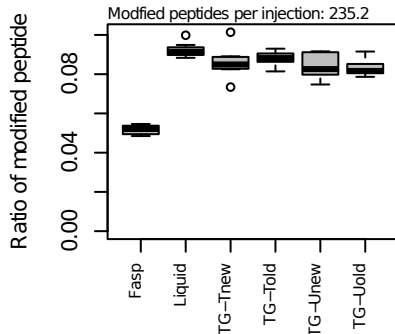

### Propionamidated Lys

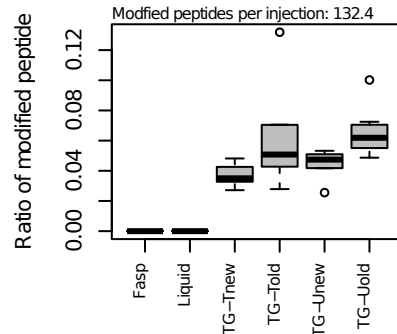

### Ammonia loss on Nter Gln

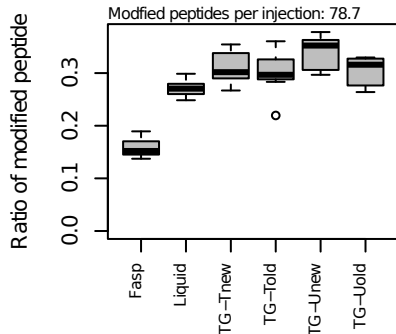

### Acetylation of Nter

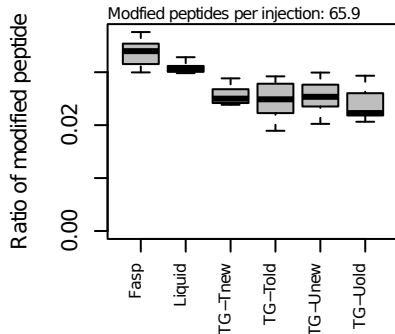

### Propionamidated Nter

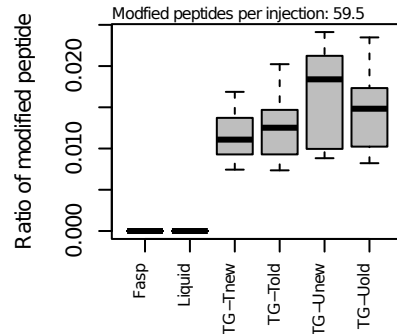

### Propionamidated Cys

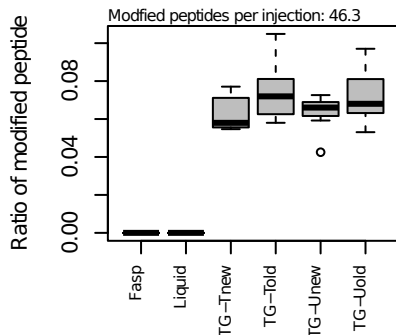

### Trp oxidation

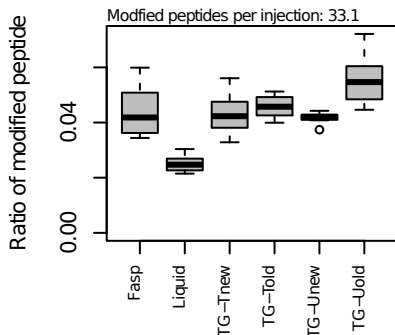

### Deamided Gln

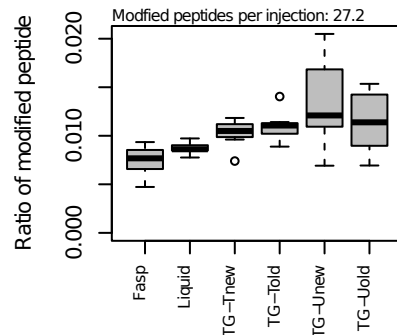

# Ammonia loss of Nter carbamidomethylated Cys

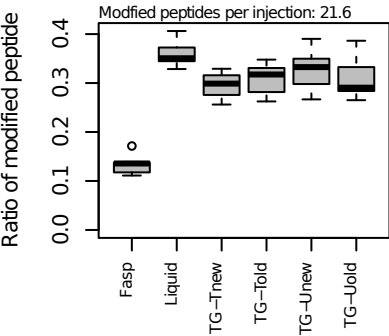

# Water loss on Nter Glu

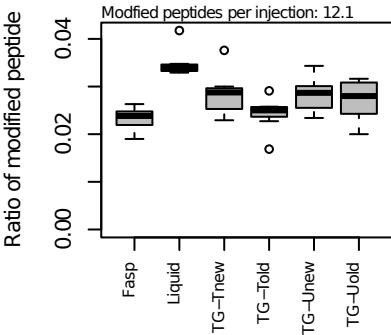

Supplement: s1 [file s1]
