# Supplementary figures and images for: Evaluation of Optimized Tube-Gel Methods of Sample Preparation for Large-Scale Plant Proteomics
Source: MDPI journal article supplement (doi:10.3390/proteomes6010006), 2018-01-30

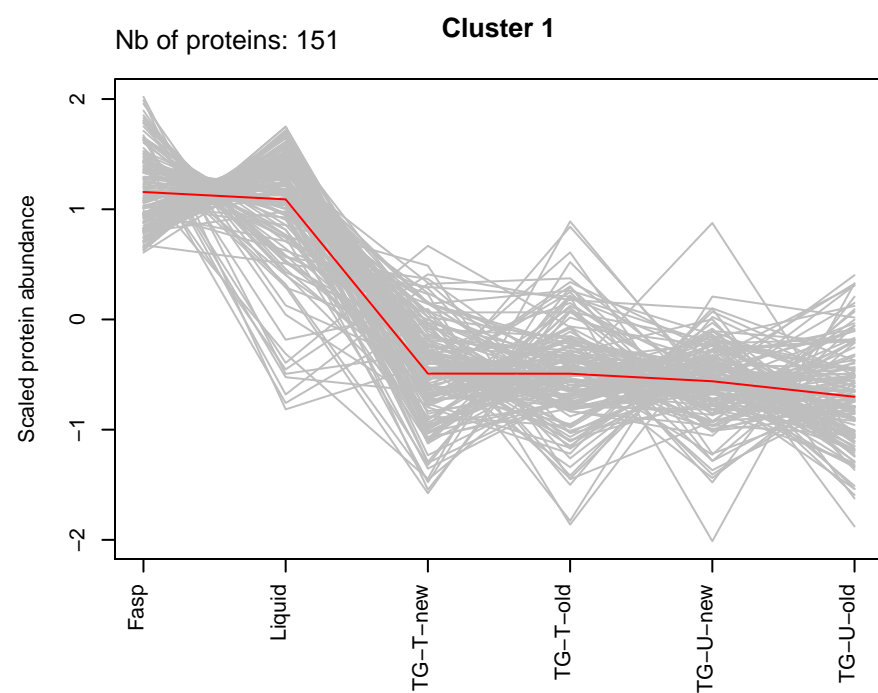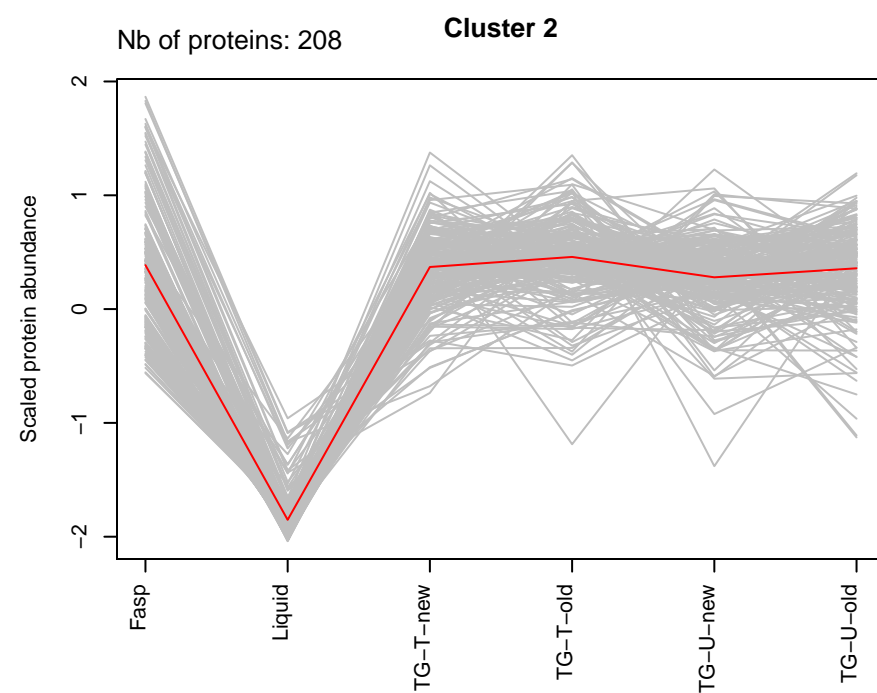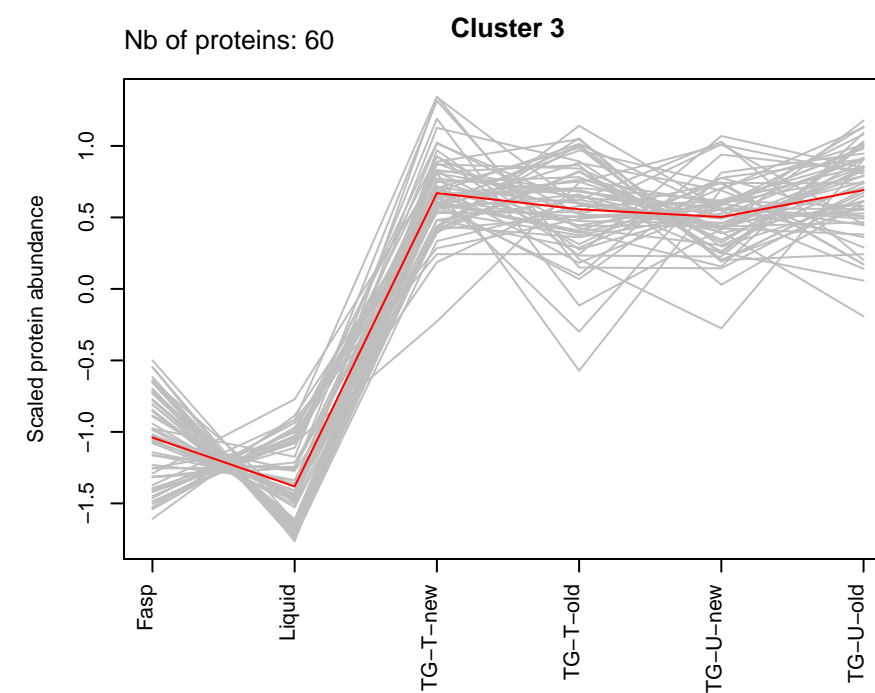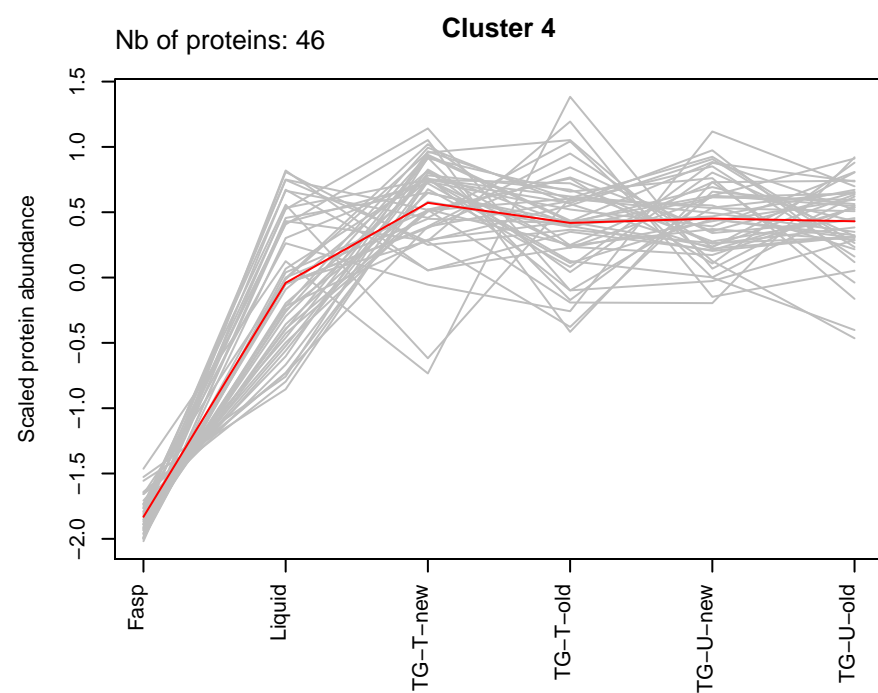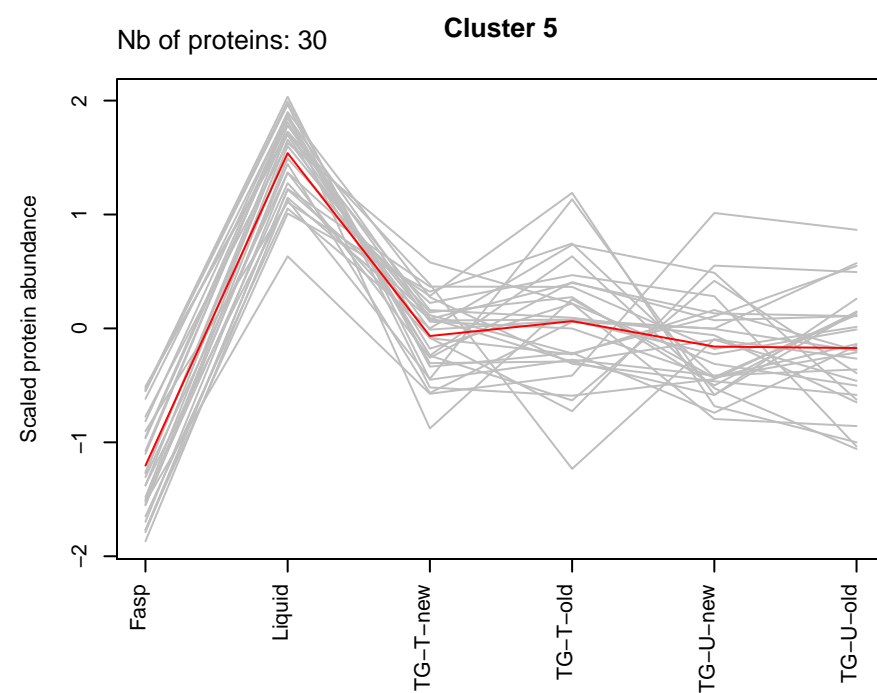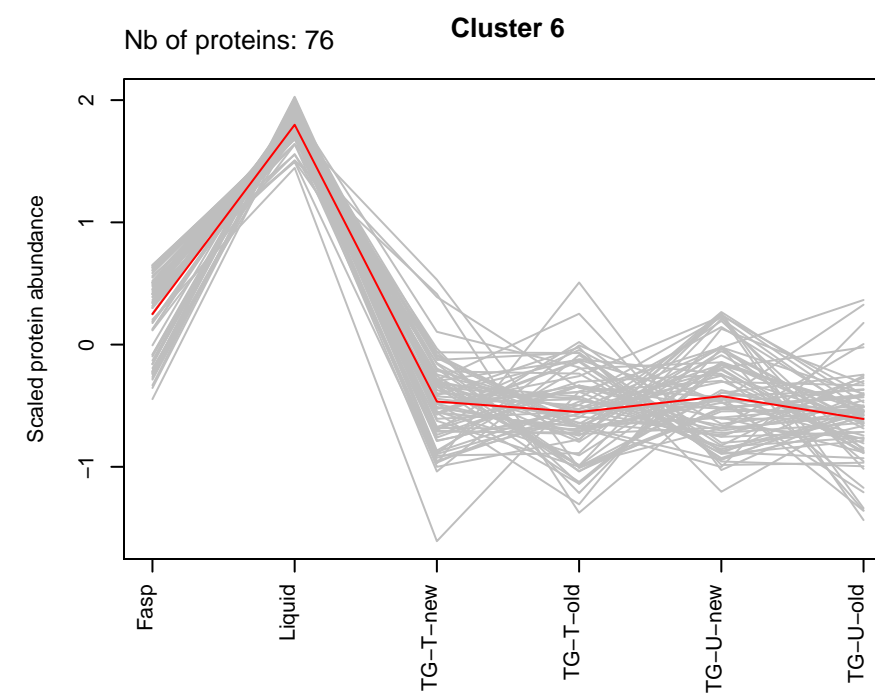

Supplement: s1 [file s1]

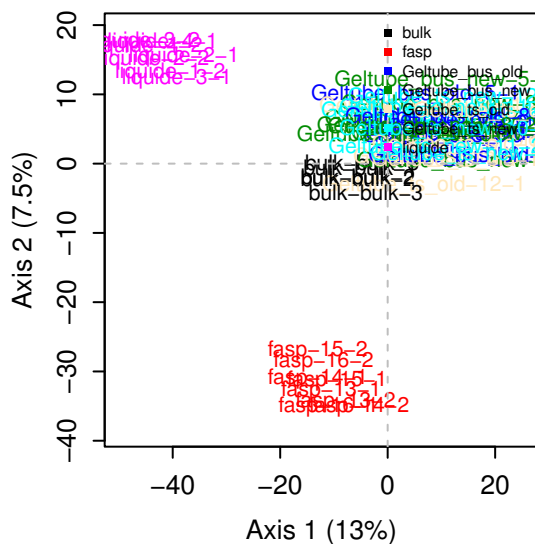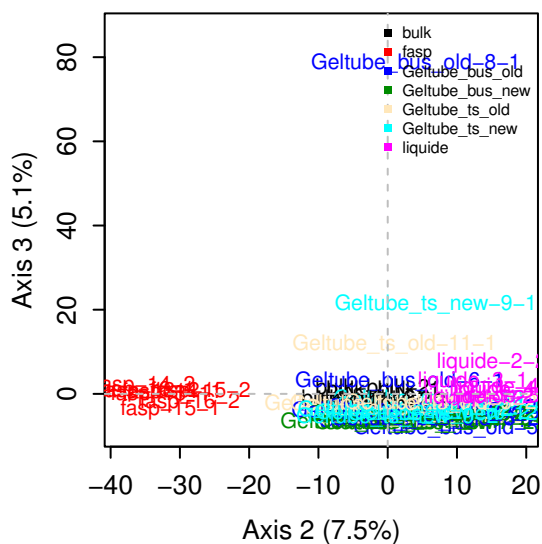

**Figure S1**  
Quality control PCA on XIC data. Outlier detected on Axis 3

Supplement: s1 [file s1]
